# Supplementary material for: Inverse design of stable spinel compounds with high optical absorption via materials genome engineering
Source: Royal Society of Chemistry journal article supplement (doi:10.1039/d2ta02306g), 2022-01-01
Supplement: d2ta02306g1.pdf [file d2ta02306g1.pdf]

## Supplemental Information

### Inverse Design of Stable Spinel Compounds with High Optical Absorption via Materials Genome Engineering

Qingde Sun<sup>1,2</sup>, Su-Huai Wei<sup>2\*</sup>

<sup>1</sup>Hunan Provincial Key Laboratory of Flexible Electronic Materials Genome Engineering, School of Physics and Electronic Science, Changsha University of Science and Technology, Changsha, 410114, China

<sup>2</sup>Beijing Computational Science Research Center, Beijing 100193, China

#### TABLE OF CONTENTS:

1. Figure S1: The calculated decomposition energies of  $\text{CdBi}_2\text{S}_4$ ,  $\text{PbBi}_2\text{S}_4$ ,  $\text{PbIn}_2\text{S}_4$  and  $\text{CdIn}_2\text{S}_4$
2. Figure S2: The calculated phonon spectrum of  $\text{CdBi}_2\text{S}_4$ ,  $\text{PbBi}_2\text{S}_4$ ,  $\text{PbIn}_2\text{S}_4$  and  $\text{CdIn}_2\text{S}_4$
3. Table S1: The PBE-calculated band gaps, electron and hole effective mass of  $\text{CdBi}_2\text{S}_4$ ,  $\text{PbBi}_2\text{S}_4$ ,  $\text{PbIn}_2\text{S}_4$  and  $\text{CdIn}_2\text{S}_4$

The decomposition energies of the four examples of four types of spinel compounds, i.e.  $\text{CdBi}_2\text{S}_4$  (type-I),  $\text{PbBi}_2\text{S}_4$  (type-II),  $\text{PbIn}_2\text{S}_4$  (type-III) and  $\text{CdIn}_2\text{S}_4$  (type-IV) are calculated in common decomposition pathways (decomposing into binary compounds), as shown in [Fig. S1](#). The positive values indicate that they are thermodynamically stable. The phonon spectrum of these four cases are shown in [Fig. S2](#). No virtual frequencies exist in  $\text{CdIn}_2\text{S}_4$  and  $\text{CdBi}_2\text{S}_4$ , indicating that they are dynamically stable in the spinel structure. Indeed,  $\text{CdIn}_2\text{S}_4$  and  $\text{CdBi}_2\text{S}_4$  have been synthesized in experiment<sup>1,2</sup>. The weak negative frequencies of  $\text{PbBi}_2\text{S}_4$  and  $\text{PbIn}_2\text{S}_4$  indicates that there may exist some local distortions for these compounds in these spinel structure. We notice that the alloy  $(\text{Cd,Pb})\text{Bi}_2\text{S}_4$  has also been synthesized in experiment<sup>3</sup>.

The electronic properties such as band gaps and effective mass of  $\text{CdBi}_2\text{S}_4$ ,  $\text{PbBi}_2\text{S}_4$ ,  $\text{PbIn}_2\text{S}_4$  and  $\text{CdIn}_2\text{S}_4$  are shown in Table S1.  $\text{CdIn}_2\text{S}_4$  has pseudodirect band gap, while the other three have indirect band gaps. We conduct the HSE calculations with the parameter  $\alpha = 0.28$  to align the benchmark of the experimental band gap of  $\text{CdIn}_2\text{S}_4$  (2.2 eV).<sup>4</sup>

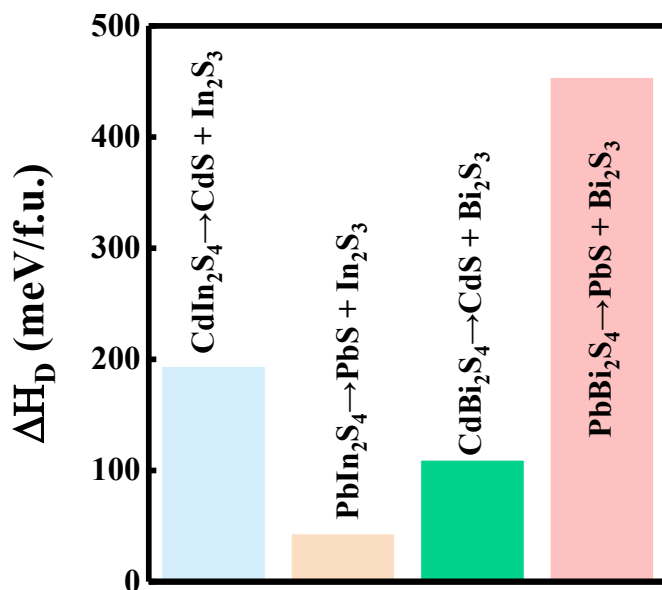

**Figure S1.** The calculated decomposition energies of  $\text{CdBi}_2\text{S}_4$  (type-I),  $\text{PbBi}_2\text{S}_4$  (type-II),  $\text{PbIn}_2\text{S}_4$  (type-III) and  $\text{CdIn}_2\text{S}_4$  (type-IV) along the common decomposition pathways.

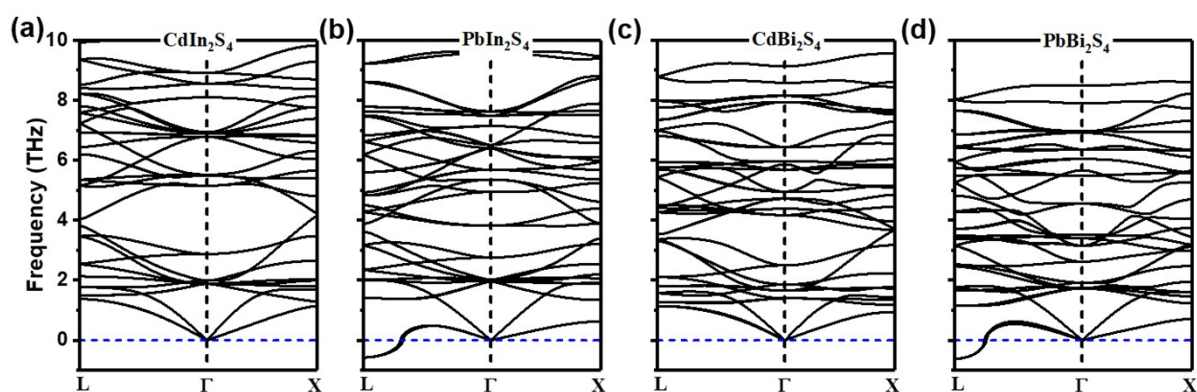

**Figure S2.** The calculated phonon spectrum of (a)  $\text{CdBi}_2\text{S}_4$ , (b)  $\text{PbBi}_2\text{S}_4$ , (c)  $\text{PbIn}_2\text{S}_4$  and (d)  $\text{CdIn}_2\text{S}_4$  at 0K.

**Table S1.** The PBE-calculated and HSE-calculated ( $\alpha = 0.28$ ) band gaps, electron and hole effective mass for four examples of four types of spinel compounds, i.e. CdBi<sub>2</sub>S<sub>4</sub> (type-I), PbBi<sub>2</sub>S<sub>4</sub> (type-II), PbIn<sub>2</sub>S<sub>4</sub> (type-III) and CdIn<sub>2</sub>S<sub>4</sub> (type-IV).

| Spinel compounds                 | PBE gap(eV)            | HSE gap(eV) | Electron effective mass ( $m_e$ ) | Hole effective mass ( $m_e$ ) |
|----------------------------------|------------------------|-------------|-----------------------------------|-------------------------------|
| CdIn <sub>2</sub> S <sub>4</sub> | 1.11<br>(pseudodirect) | 2.20        | 0.14                              | 2.75                          |
| PbIn <sub>2</sub> S <sub>4</sub> | 0.80 (indirect)        | 1.48        | 0.68                              | 0.37                          |
| CdBi <sub>2</sub> S <sub>4</sub> | 0.74 (indirect)        | 1.68        | 0.18                              | 0.47                          |
| PbBi <sub>2</sub> S <sub>4</sub> | 1.55 (indirect)        | 2.26        | 0.59                              | 0.87                          |

## References

1. B. B. Kale, J. O. Baeg, S. M. Lee, H. Chang, S. J. Moon and C. W. Lee, *Adv. Funct. Mater.*, 2006, **16**, 1349-1354.
2. V. Semenov, O. Ostapenko, A. Lukin, E. Zavalishin and A. Y. Zavrzhnov, *Inorg. Mater.*, 2000, **36**, 1197-1199.
3. T. i. Balić-Žunić and E. Makovicky, *Can. Mineral.*, 2007, **45**, 437-443.
4. S.-i. Katsuki, *J. Phys. Soc. Japan*, 1972, **33**, 1561-1565.
